# Supplementary material for: Racial and ethnic differences in clinical outcomes among patients with multiple myeloma treated with CAR T-cell therapy
Source: PubMed Central journal article supplement — Blood Adv. 2023 Oct 18;8(1):251–9. doi: 10.1182/bloodadvances.2023010894 (PMC10918426; doi:10.1182/bloodadvances.2023010894), 2023-10-18
Supplement: BLOODA_ADV-2023-010894-mmc1.pdf [file BLOODA_ADV-2023-010894-mmc1.pdf]

## **SUPPLEMENTAL MATERIAL**

### **Supplemental Figure 1**

**2**

Flow chart of the study population included in the analysis.

### **Supplemental Table 1**

**3**

Best overall response and best complete response (CR) or better at day 30, day 90, and best response over all time points by race and ethnicity.

### **Supplemental Table 2**

**4**

Odds ratios and 95% confidence intervals for the association of race and ethnicity with best ORR and best CR or better, N=171.

**Supplemental Figure 1.** Flow chart of the study population included in the analysis.

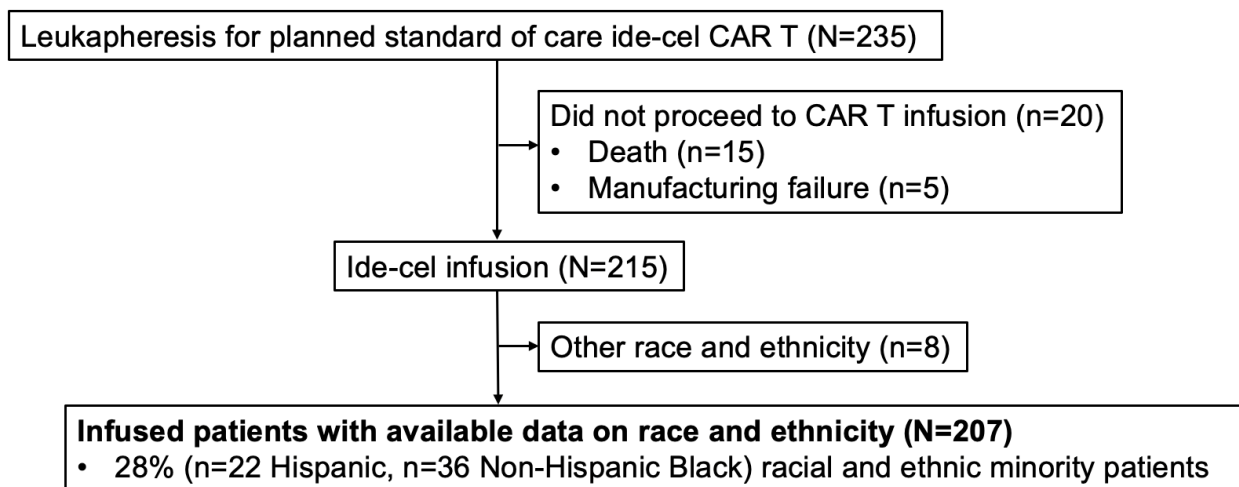

**Supplemental Table 1.** Best overall response and best complete response (CR) or better at day 30, day 90, and best response over all time points by race and ethnicity.

| <b>Patient Characteristics</b> | <b>Hispanic<br/>N = 22</b> | <b>Non-Hispanic<br/>Black<br/>N = 36</b> | <b>Non-Hispanic<br/>White<br/>N = 149</b> | <b>P</b> |
|--------------------------------|----------------------------|------------------------------------------|-------------------------------------------|----------|
| <b>Day 30</b>                  |                            |                                          |                                           |          |
| ORR, n (%)                     |                            |                                          |                                           | 0.2      |
| ORR                            | 13 (62)                    | 29 (81)                                  | 112 (79)                                  |          |
| SD/PD                          | 8 (38)                     | 7 (19)                                   | 30 (21)                                   |          |
| Unknown                        | 1                          | 0                                        | 7                                         |          |
| CR or better, n (%)            |                            |                                          |                                           | 0.06     |
| CR or better                   | 2 (10)                     | 14 (39)                                  | 41 (29)                                   |          |
| < CR                           | 19 (90)                    | 22 (61)                                  | 101 (71)                                  |          |
| Unknown                        | 1                          | 0                                        | 7                                         |          |
| <b>Day 90</b>                  |                            |                                          |                                           |          |
| ORR, n (%)                     |                            |                                          |                                           | 0.02     |
| ORR                            | 10 (48)                    | 23 (66)                                  | 108 (76)                                  |          |
| SD/PD                          | 11 (52)                    | 12 (34)                                  | 34 (24)                                   |          |
| Unknown                        | 1                          | 1                                        | 7                                         |          |
| CR or better, n (%)            |                            |                                          |                                           | 0.3      |
| CR or better                   | 5 (24)                     | 11 (31)                                  | 57 (40)                                   |          |
| < CR                           | 16 (76)                    | 24 (69)                                  | 85 (60)                                   |          |
| Unknown                        | 1                          | 1                                        | 7                                         |          |
| <b>Best response</b>           |                            |                                          |                                           |          |
| ORR, n (%)                     |                            |                                          |                                           | 0.01     |
| ORR                            | 13 (59)                    | 31 (86)                                  | 126 (86)                                  |          |
| SD/PD                          | 9 (41)                     | 5 (14)                                   | 20 (14)                                   |          |
| Unknown                        | 0                          | 0                                        | 3                                         |          |
| CR or better, n (%)            |                            |                                          |                                           | 0.1      |
| CR or better                   | 15 (68)                    | 15 (42)                                  | 72 (49)                                   |          |
| < CR                           | 7 (32)                     | 21 (58)                                  | 74 (51)                                   |          |
| Unknown                        | 0                          | 0                                        | 3                                         |          |

ORR: overall response rate, SD: stable disease, PD: progressive disease, CR: complete response.

Responses were considered unknown if the patient reached the time point of interest but had a missing response or if the patient did not reach the time point of interest. If a patient died or progressed prior to the time point of interest, this patient was given a response of PD.

**Supplemental Table 2.** Odds ratios and 95% confidence intervals for the association of race and ethnicity with best ORR and best CR or better, N=171.

| Race and ethnicity | N (N event) | Best ORR             |                      | N (N event) | Best CR or better    |                      |
|--------------------|-------------|----------------------|----------------------|-------------|----------------------|----------------------|
|                    |             | Model 1 <sup>a</sup> | Model 2 <sup>b</sup> |             | Model 1 <sup>a</sup> | Model 2 <sup>b</sup> |
|                    |             | OR (95% CI)          | OR (95% CI)          |             | OR (95% CI)          | OR (95% CI)          |
| Non-Hispanic White | 126 (16)    | 1.00 (Referent)      | 1.00 (Referent)      | 126 (52)    | 1.00 (Referent)      | 1.00 (Referent)      |
| Hispanic           | 16 (7)      | 5.35 (1.70, 16.50)   | 7.12 (1.97, 26.90)   | 16 (10)     | 1.72 (0.60, 5.32)    | 1.58 (0.52, 5.17)    |
| Non-Hispanic Black | 29 (4)      | 1.10 (0.30, 3.31)    | 1.13 (0.27, 3.85)    | 29 (11)     | 0.63 (0.27, 1.43)    | 0.64 (0.26, 1.51)    |

OR: odds ratio, CI: confidence interval, BCMA: B-cell maturation antigen, ECOG: Eastern Cooperative Oncology Group.

<sup>a</sup>Model 1 is unadjusted.

<sup>b</sup>Model 2 includes prior BCMA therapy, high-risk cytogenetics, extramedullary disease, cell dose, ECOG at lymphodepletion chemotherapy, penta-refractory status, age, and number of prior lines of therapy.
